# Supplementary material
Source: publisher figshare collection journal article supplement (https://gsapubs.figshare.com/ndownloader/files/22744529)

**Figure DR1:**

Additional photograph of the left-normal fault system in the northern part of the Kulesayi area; person for scale. View to the east of a normal fault scarp near station 906-2 in Figure 8a. Conglomerates in footwall are gray. Light-colored, loess-rich deposits have partially infilled the hanging wall graben to the south of the scarp but are also faulted. Colluvial wedge in mid-distance is youngest unit, and does not appear to be faulted.

View to 060°

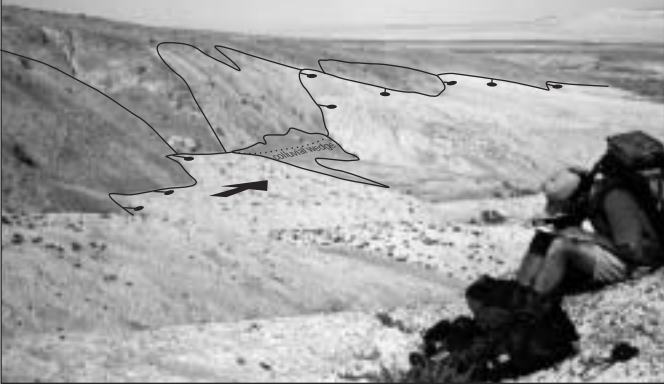

Supplement: Supplementary file 1 [file 22744529]
